# Supplementary material
Source: publisher figshare collection journal article supplement (https://frontiersin.figshare.com/ndownloader/files/14923394)

# COG function classification of the control

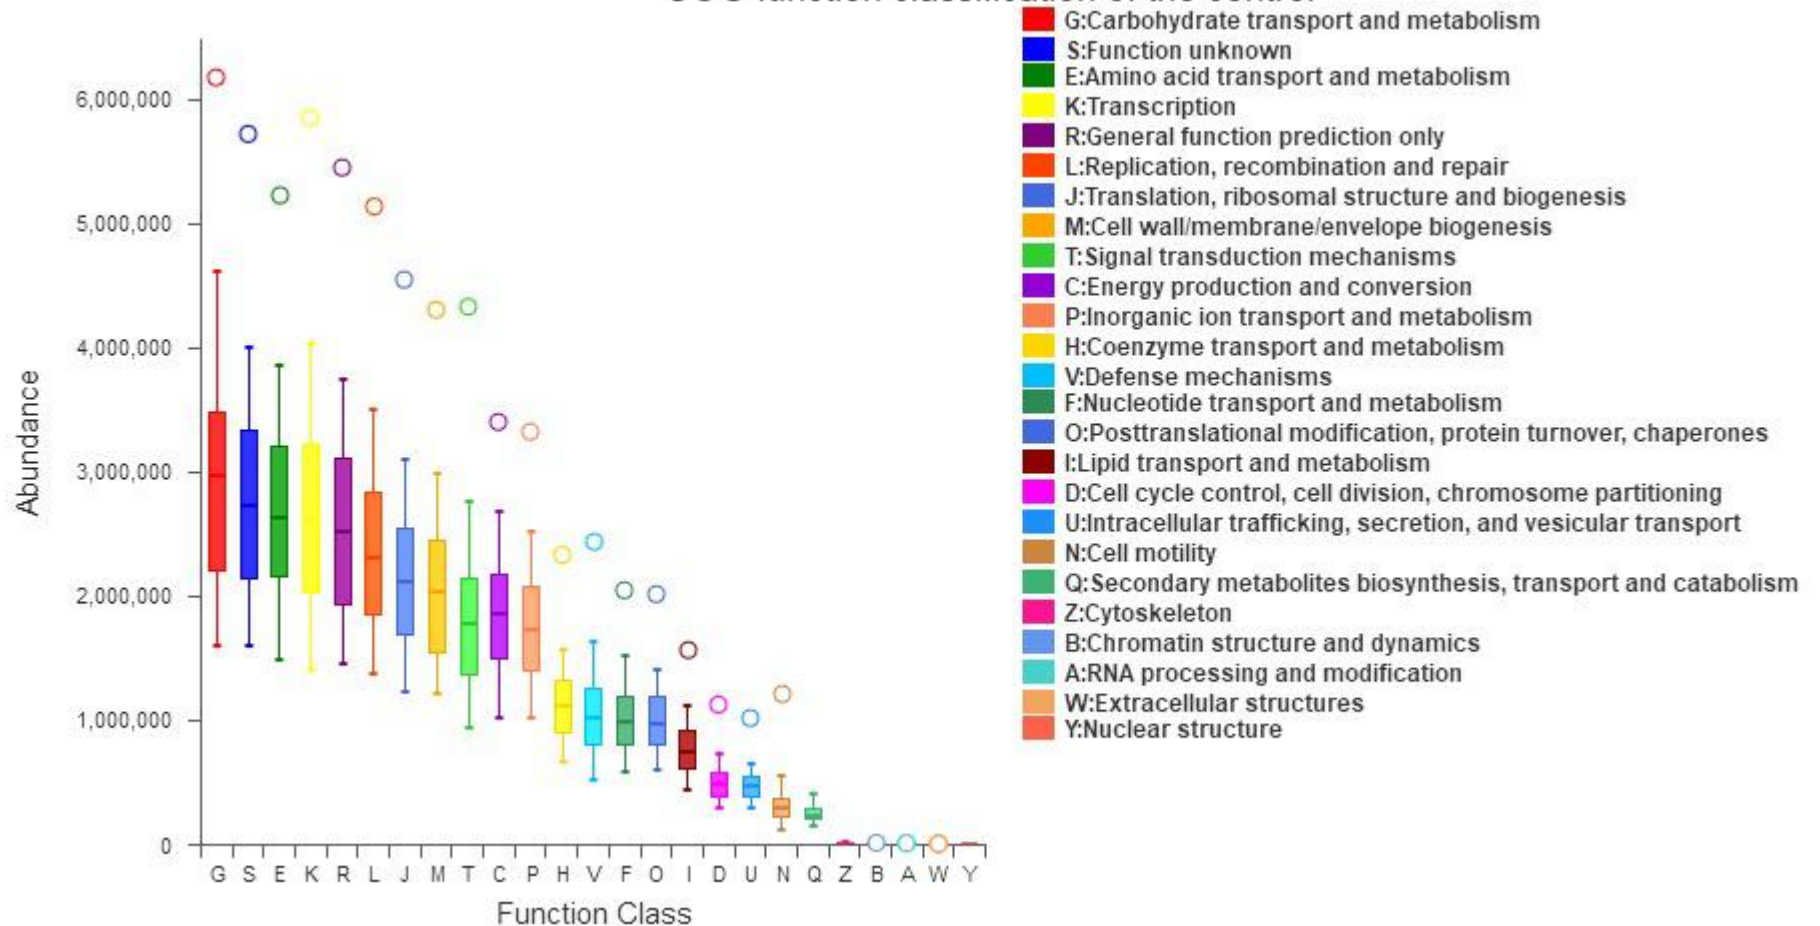

# COG function classification of the LC

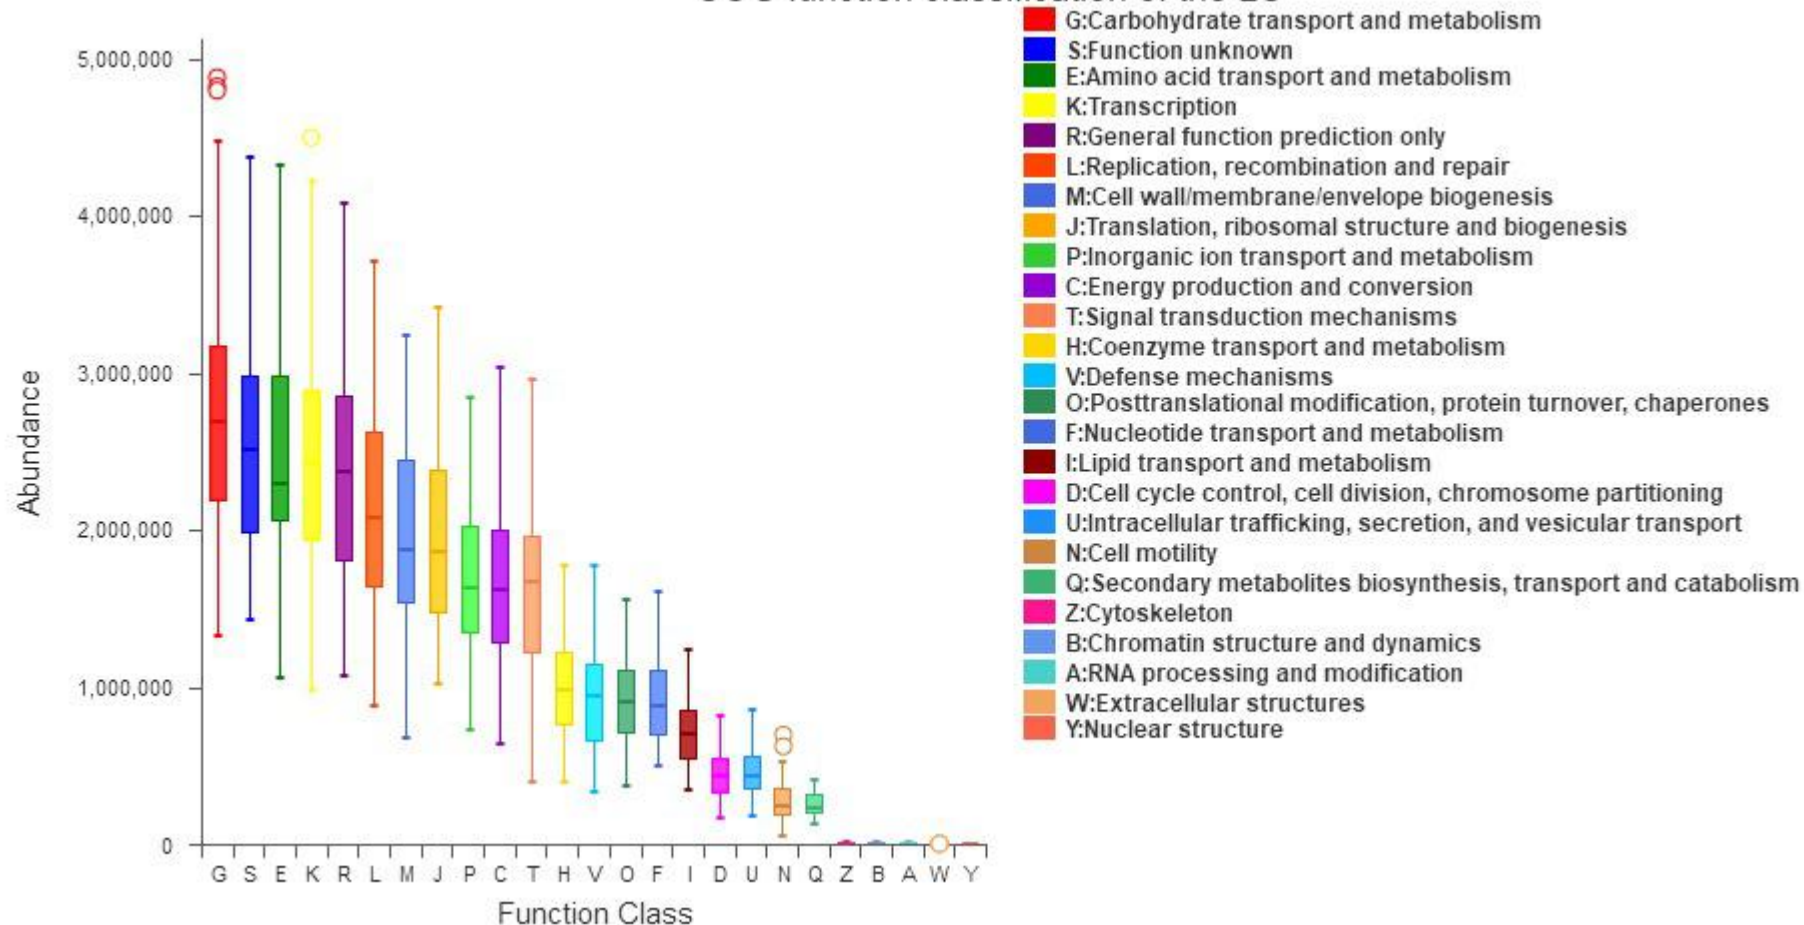

Supplement: Supplementary file [file 14923394]
